# Supplementary material for: The elusive aldol reaction of enolates with aldolates—a highly stereoselective process using three different carbonyl components
Source: Royal Society of Chemistry journal article supplement (doi:10.1039/b209536j), 2002-12-19
Supplement: b209536j.doc [file b209536j.doc]

**Electronic supporting information (ESI)**

# **The Elusive Aldol Reaction of Enolates with Aldolates - A Highly Stereoselective Process Using Three Different Carbonyl Components**

# Michael Schmittel, Andreas Haeuseler, Tom Nilges and Arno Pfitzner

2-Ethyl-3,5-dimethyl-4,6-diphenyl-tetrahydropyran-2,4-diol (**8a**):

To a solution of 210 l (2.00 mmol) diethylketone in 10 ml anhydrous THF 4.0 ml (2.0 mmol) of a 0.5 mol/l LDA solution in THF/hexane are added a -40 °C. After stirring the reaction mixture for 0.5 h at this temperature, 117 l (1.00 mmol) tin tetrachloride are added slowly and the solution was stirred for another 0.5 h and afterwards cooled to -80 °C.

In a second reaction flask a solution of 480 mg (2.00 mmol) *anti*-**5a** in 10 ml of anhydrous THF are deprotonated with 4.0 ml (2.0 mmol) of 0.5 mol/l LDA solution at -80 °C. After stirring for 5 min the first solution of tin bisenolate is added slowly *via* syringe. The cooling bath was removed and the reaction mixture was stirred for 2 h at rt and 2 h at 40 °C. After hydrolysis with sat. sodium hydrogencarbonate the aqueous phase was extracted with dichloromethane. The combined organic phases were dried over sodium sulfate. After removing the solvent the crude product was extracted with *n*-hexane an recristallized from ethanol yielding 258 mg (0.79 mmol, 63%) of **8a**. 1H-NMR(CDCl3, 400 MHz):  = 0.36 (d, 3*J* = 6.9 Hz, 3 H), 0.77 (d, 3*J* = 7.1 Hz, 3 H), 1.02 (t, 3*J* = 7.5 Hz, 3 H), 1.71 (q, 3*J* = 7.5 Hz, 2 H), 2.09 (qd, 3*J* = 10.4 Hz, 3*J* = 6.9 Hz, 1 H), 2.25 (q, 3*J* = 7.1 Hz, 1 H), 3.49 (br. s, 1 H, OH), 4.01 (br. s, 1 H, OH), 4.85 (d, 3*J* = 10.4 Hz, 1 H), 7.1-7.4 (m, 8 H), 7.7 (m, 2 H); 13C-NMR (CDCl3, 50 MHz):  = 7.8, 9.6, 10.7, 33.1, 42.9, 46.7, 74.8, 78.1, 101.5, 126.4, 126.5, 127.6, 127.8, 128.2, 141.1, 144.6; IR [KBr]: = 3256 cm-1 (br. m), 2990 (m), 2879 (w), 1473 (s), 1342 (m), 1167 (w), 1047 (s), 983 (s), 770 (m), 699 (s), 549 (w); Mp: 161 °C; Anal. Calcd. for C21H26O3: C, 77.27, H, 8.03; Found: C, 76.78, H, 7.89.

X-Ray structure of **8a**:

**General aspects**

**8a** was received after recrystallisation from ethanol. X-ray analysis shows only one enantiomer of **8a**; hence crystallisation leads to the formation of a conglomerate containing equal amounts of enantio­morphous crystals.

All alkyl and aryl groups are in equatorial positions of the tetrahydropyran ring that assumes a chair conformation.

|  |  |
| --- | --- |

**Fig. 1.** Crystal structure of **8a** from two different perspectives.

The molecules in the crystal adopt a position allowing for alternating intramolecular and intermolecular hydrogen bonding between OH functionalities (forming hydrogen bonding chain along the c-axis).

**Fig. 2.** Hydrogen bond chain showing the alternating intramolecular and intermolecular hydrogen bonding between OH functionalities of **8a** along the c-axis.
